# Supplementary material for: Prognostic significance of tissue factor in patients with pancreatic cancer: a systematic review protocol
Source: PubMed Central journal article supplement — BMJ Open. 2020 Sep 14;10(9):e037431. doi: 10.1136/bmjopen-2020-037431 (PMC7490930; doi:10.1136/bmjopen-2020-037431), 2020-09-14
Supplement: bmjopen-2020-037431.draft_revisions.pdf [file bmjopen-2020-037431.draft_revisions.pdf]

# BMJ Open

BMJ Open is committed to open peer review. As part of this commitment we make the peer review history of every article we publish publicly available.

When an article is published we post the peer reviewers' comments and the authors' responses online. We also post the versions of the paper that were used during peer review. These are the versions that the peer review comments apply to.

The versions of the paper that follow are the versions that were submitted during the peer review process. They are not the versions of record or the final published versions. They should not be cited or distributed as the published version of this manuscript.

BMJ Open is an open access journal and the full, final, typeset and author-corrected version of record of the manuscript is available on our site with no access controls, subscription charges or pay-per-view fees (<http://bmjopen.bmj.com>).

If you have any questions on BMJ Open's open peer review process please email [info.bmjopen@bmj.com](mailto:info.bmjopen@bmj.com)

# BMJ Open

## Association of tissue factor expression with prognosis and clinical features in human pancreatic cancer: a systematic review protocol

|                               |                                                                                                                                                                                                                                                                                                                                                                                                                                                                                                                                                                                                                                                                                                                                                                                                                                                                                                                                                                                                                                                                                                                                                                                         |
|-------------------------------|-----------------------------------------------------------------------------------------------------------------------------------------------------------------------------------------------------------------------------------------------------------------------------------------------------------------------------------------------------------------------------------------------------------------------------------------------------------------------------------------------------------------------------------------------------------------------------------------------------------------------------------------------------------------------------------------------------------------------------------------------------------------------------------------------------------------------------------------------------------------------------------------------------------------------------------------------------------------------------------------------------------------------------------------------------------------------------------------------------------------------------------------------------------------------------------------|
| Journal:                      | <i>BMJ Open</i>                                                                                                                                                                                                                                                                                                                                                                                                                                                                                                                                                                                                                                                                                                                                                                                                                                                                                                                                                                                                                                                                                                                                                                         |
| Manuscript ID                 | bmjopen-2020-037431                                                                                                                                                                                                                                                                                                                                                                                                                                                                                                                                                                                                                                                                                                                                                                                                                                                                                                                                                                                                                                                                                                                                                                     |
| Article Type:                 | Protocol                                                                                                                                                                                                                                                                                                                                                                                                                                                                                                                                                                                                                                                                                                                                                                                                                                                                                                                                                                                                                                                                                                                                                                                |
| Date Submitted by the Author: | 03-Feb-2020                                                                                                                                                                                                                                                                                                                                                                                                                                                                                                                                                                                                                                                                                                                                                                                                                                                                                                                                                                                                                                                                                                                                                                             |
| Complete List of Authors:     | Li, Haiyuan ; The Department of Tumor Surgery, Lanzhou University Second Hospital, ; The Second Clinical Medical College, Lanzhou University,<br>Yu, Yang ; The Second Clinical Medical College, Lanzhou University,<br>Shi, Qianling ; The First Clinical Medical College, Lanzhou University, The First Clinical Medical College of Lanzhou University<br>Chen, Xueping ; Sleep Medicine Center, Gansu Provincial Hospital<br>Zhen, Peng ; The Second Clinical Medical College, Lanzhou University<br>Wang, Dengfeng ; The Second Clinical Medical College, Lanzhou University<br>Tao, Pengxian ; The Second Clinical Medical College, Lanzhou University<br>Gu, Baohong ; The Second Clinical Medical College, Lanzhou University<br>Li, Xuemei ; The Second Clinical Medical College, Lanzhou University<br>Zhang, Tao<br>Xiang, Lin ; The Second Clinical Medical College, Lanzhou University<br>Xi, Dayong ; The Second Clinical Medical College, Lanzhou University<br>Gao, Lei ; The Second Clinical Medical College, Lanzhou University<br>Maswikiti Ewetse , Paul; The Second Clinical Medical College, Lanzhou University,<br>Chen, Hao; Lanzhou University Second Hospital, |
| Keywords:                     | Gastrointestinal tumours < ONCOLOGY, Pancreatic disease < GASTROENTEROLOGY, Molecular biology < TROPICAL MEDICINE                                                                                                                                                                                                                                                                                                                                                                                                                                                                                                                                                                                                                                                                                                                                                                                                                                                                                                                                                                                                                                                                       |
|                               |                                                                                                                                                                                                                                                                                                                                                                                                                                                                                                                                                                                                                                                                                                                                                                                                                                                                                                                                                                                                                                                                                                                                                                                         |

SCHOLARONE™  
Manuscripts

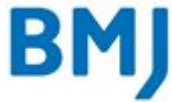

I, the Submitting Author has the right to grant and does grant on behalf of all authors of the Work (as defined in the below author licence), an exclusive licence and/or a non-exclusive licence for contributions from authors who are: i) UK Crown employees; ii) where BMJ has agreed a CC-BY licence shall apply, and/or iii) in accordance with the terms applicable for US Federal Government officers or employees acting as part of their official duties; on a worldwide, perpetual, irrevocable, royalty-free basis to BMJ Publishing Group Ltd ("BMJ") its licensees and where the relevant Journal is co-owned by BMJ to the co-owners of the Journal, to publish the Work in this journal and any other BMJ products and to exploit all rights, as set out in our [licence](#).

The Submitting Author accepts and understands that any supply made under these terms is made by BMJ to the Submitting Author unless you are acting as an employee on behalf of your employer or a postgraduate student of an affiliated institution which is paying any applicable article publishing charge ("APC") for Open Access articles. Where the Submitting Author wishes to make the Work available on an Open Access basis (and intends to pay the relevant APC), the terms of reuse of such Open Access shall be governed by a Creative Commons licence – details of these licences and which [Creative Commons](#) licence will apply to this Work are set out in our licence referred to above.

Other than as permitted in any relevant BMJ Author's Self Archiving Policies, I confirm this Work has not been accepted for publication elsewhere, is not being considered for publication elsewhere and does not duplicate material already published. I confirm all authors consent to publication of this Work and authorise the granting of this licence.

1  
2  
3  
4 **Association of tissue factor expression with prognosis**  
5  
6  
7 **and clinical features in human pancreatic cancer: a**  
8  
9 **systematic review protocol**  
10

11 Haiyuan Li<sup>1,2</sup>, Yang Yu<sup>2</sup>, Qianling Shi<sup>3</sup>, Xueping Chen<sup>4</sup>, Peng Zheng<sup>2</sup>, Dengfeng

12 Wang<sup>2</sup>, Pengxian Tao<sup>2</sup>, Baohong Gu<sup>2</sup>, Xuemei Li<sup>2</sup>, Tao zhang<sup>2</sup>, Lin Xiang<sup>2</sup>, Dayong

13 Xi<sup>2</sup>, Lei Gao<sup>2</sup>, Maswikiti Ewetse Paul<sup>2</sup>, Hao Chen<sup>1\*</sup>  
14  
15  
16  
17  
18

19 1. The Department of Tumor Surgery, Lanzhou University Second Hospital, Lanzhou

20  
21  
22 730030, China;  
23

24 2. The Second Clinical Medical College, Lanzhou University, Lanzhou 730030,

25  
26  
27 China;  
28

29 3. The First Clinical Medical College, Lanzhou University, Lanzhou 730000, China;  
30

31 4. Sleep Medicine Center, Gansu Provincial Hospital, Lanzhou 730000, China;  
32

33  
34  
35 Haiyuan Li and Yang Yu contributed equally  
36

37 \* Corresponding Author: Hao Chen, MD, PhD, the Department of Tumor Surgery,  
38

39  
40 Lanzhou University Second Hospital, Lanzhou 730030, China;  
41

42  
43 Tel: +86-15009467790; E-mail: chenhaodrs@163.com.  
44  
45  
46  
47  
48  
49  
50  
51  
52  
53  
54  
55  
56  
57  
58  
59  
60

## Abstract

**Introduction:** Pancreatic cancer is a type of highly aggressive digestive system tumour with poor prognosis. Venous thromboembolism (VTE) is a well-known complication of pancreatic cancer. Tissue factor (TF) is an important factor which contributes to the generation of a hypercoagulable state and thrombotic disease in pancreatic cancer. Several studies showed that TF expression with different types was related to the clinicopathological features of pancreatic cancer and influenced the survival of patients with pancreatic cancer. We thus want to conduct a systematic review of the literature to clarify the association between TF expression and clinicopathological features/prognosis of pancreatic cancer patients.

**Methods and analysis:** Studies comparing the clinicopathological features and the prognosis between pancreatic cancer patients with high and low expression of TF in tissue, plasma and MVs levels are eligible for the review. The outcomes include survival endpoints and the relationship between TF expression and clinicopathological features, such as VTE, tumor embolus, tumour size, clinical stage, and differentiation. Primary studies of any type published in English are included. Two reviewers will search the Medline, EMBASE and Cochrane from inception to Jan 2020 and retrieve the relevant studies. The same reviewers independently select the literatures and extract the data of included studies. The quality of the each included study is assessed by the Newcastle-Ottawa Scale (NOS score). The HR and 95% CI of each study are pooled for the survival outcome, and the pooled odds ratio (OR) and 95% CI are used for other outcomes. If a meta-analysis is not appropriate,

1  
2  
3  
4 the result will only be reported qualitatively. Subgroup and sensitivity analyses are  
5  
6 considered to identify the source of heterogeneity. The Grades of Recommendation,  
7  
8 Assessment, Development and Evaluation method is applied to assess the level of  
9  
10 evidence obtained from this systematic review.  
11  
12  
13  
14

15 **Ethics and dissemination:** There is no concerning ethical issue. The result will be  
16  
17 sought for publication.  
18  
19  
20

21 **PROSPERO registration number:** CRD42019133665  
22  
23  
24

25 **Key words:** pancreatic cancer; tissue factor; microvesicle; prognosis; systematic  
26  
27 review  
28  
29  
30  
31  
32  
33  
34  
35  
36  
37  
38  
39  
40  
41  
42  
43  
44  
45  
46  
47  
48  
49  
50  
51  
52  
53  
54  
55  
56  
57  
58  
59  
60

### Strengths and limitations of this study

- This is the first systematic review addressing the significance of the TF for pancreatic cancer from different levels.
- Multiple outcomes are collected and analysed in this systematic review.
- It may be difficult to combine the results due to a small number of studies and substantial heterogeneity.

## Introduction

Pancreatic cancer is a type of highly aggressive digestive system tumor with poor prognosis.<sup>1</sup> It is estimated that pancreatic cancer will be the second largest cancer-related cause of death in the United States by 2030.<sup>2</sup> Pancreatic cancer has insidious onset, rapid progression, low rate of early diagnosis and radical resection.<sup>3</sup> Most of the patients already have advanced or distant metastasis at the first diagnosis. Despite recent advances in surgical techniques as well as chemotherapy and radiation therapy, pancreatic cancer patients still has a dismal 5-year survival rate.<sup>3</sup>

Venous thromboembolism (VTE), associated with the generation of an intrinsic hypercoagulable state, is a well-known complication of malignant tumor. Spreau first discovered that pancreatic cancer patients are prone to VTE in 1938.<sup>4</sup> Subsequently, the incidence of VTE in pancreatic cancer patients ranges from 17% to 57% by Khorana.<sup>5</sup> Furthermore, several studies have found that thrombosis and diffuse intravascular coagulation are associated with poor prognosis in patients with pancreatic cancer.<sup>6-10</sup> However, the relationship between VTE and pancreatic cancer and the biological significance of VTE are not completely understood.

Several factors may play an important part in the generation of a hypercoagulable state and VTE in pancreatic cancer. Of prime importance is tissue factor (TF), a single chain transmembrane-receptor glycoprotein with a molecular weight of approximately 47 kDa, which initiates the extrinsic pathway of coagulation.<sup>11</sup> In recent years, It was reported that TF is expressed in many malignant tumours tissues, including



1  
2  
3  
4 pancreatic cancer, leading to increased blood coagulability and a high risk of  
5  
6 VTE.<sup>12,13</sup> Similarly, the plasma TF concentration increased significantly in patients  
7  
8 with pancreatic cancer and thrombosis.<sup>14</sup> Pancreatic cancer cells express TF and  
9  
10 release Tissue factor - positive(TF<sup>+</sup>) microvesicles (MVs) (TF<sup>+</sup>MVs)<sup>15</sup> and circulating  
11  
12 TF<sup>+</sup>MVs can be detected in patients.<sup>16</sup> Importantly, the levels TF<sup>+</sup> MVs are associated  
13  
14 with VTE in patients with pancreatic cancer.<sup>17-19</sup>

21  
22 Emerging data suggest that the hemostatic system has a regulatory role in tumour  
23  
24 invasion and metastasis. Therefore, the activation of the hemostatic system may not  
25  
26 only contribute to VTE but also promote tumor invasion and metastasis. In recent  
27  
28 studies found that TF was shown to promote angiogenesis<sup>20</sup>, inflammatory reaction<sup>21</sup>,  
29  
30 tumour invasion<sup>22</sup> and metastasis.<sup>23</sup> Some evidence showed that the expression of TF  
31  
32 in metastatic melanoma cells was significantly higher than in non-metastatic cells;<sup>24</sup>  
33  
34 the expression of TF in metastatic cancer sublines was significantly higher than in  
35  
36 parental lines.<sup>25</sup> Similarly, studies have found that TF expression is related to the  
37  
38 invasion phenotype of pancreatic cancer.<sup>26</sup> In addition, compared with tumour cells  
39  
40 with a higher degree of differentiation in pancreatic cancer, tumour cells with lower  
41  
42 degree of differentiation seem to have higher TF expression and associated with  
43  
44 decreased overall survival.<sup>13,26-28</sup> Therefore, there seem to be a significant association  
45  
46 between TF and pancreatic cancer, and TF may be a potential marker of disease  
47  
48 prognosis in patients with pancreatic cancer. We plan to undertake a systematic  
49  
50 review of the literature to summarize previous evidence regarding this topic and  
51  
52  
53  
54  
55  
56  
57  
58  
59  
60

1  
2  
3  
4 clarify the prognostic significance of TF in pancreatic cancer.  
5  
6  
7

### 8 **Why it is important to do this review**

9  
10  
11 Pancreatic cancer is one of the most aggressive malignant tumours in the clinic. The

12  
13 3-year survival rate after surgical resection of primary tumours is only 17%.

14  
15  
16 Therefore, identifying markers that may predict poor prognosis will benefit patients  
17  
18 with radical or molecular targeted therapies. Some methods have been established to  
19  
20 study the TF in pancreatic cancer. However, to date, no systematic review has been  
21  
22 conducted to study the association between TF expression or activity and  
23  
24 clinicopathological features/prognosis of pancreatic cancer.  
25  
26  
27  
28  
29  
30

### 31 **Objectives**

32  
33 To systematically clarify the relationship between TF expression/activity and  
34  
35 clinicopathological features in patients with pancreatic cancer and to explore the  
36  
37 prognostic value of TF as a marker for pancreatic cancer.  
38  
39  
40  
41  
42  
43

### 44 **Methods and analysis**

#### 45 **Registration**

46  
47  
48 This protocol was registered with PROSPERO (International Prospective Register of  
49  
50 Systematic Reviews) (CRD42019133665)  
51  
52  
53  
54

#### 55 **Eligibility criteria**

#### 56 **Participants**

57  
58  
59  
60

1  
2  
3  
4 Patients with pancreatic cancer are eligible for the review. The diagnosis is  
5  
6 histologically confirmed. Surgery is performed by several surgeons in accordance  
7  
8 with the standard criteria for pancreatic cancer resection, but there are no restrictions  
9  
10 regarding the type of surgery. The resected specimens are histologically examined  
11  
12 according to the Union for International Cancer Control (UICC)  
13  
14 tumour-node-metastasis (TNM) classification. Patients are excluded if they are  
15  
16 unresectable, or have other malignancies, or receive preoperative therapy.  
17  
18  
19  
20  
21  
22  
23

### 24 **Exposure**

25  
26 The expression/activity of TF in tissue, plasma and MVs is the exposure variable of  
27  
28 this study. The TF is detected based on the resected specimens, plasma and MVs in  
29  
30 pancreatic cancer patients using the respective test methods. This review compares the  
31  
32 clinicopathological features and the prognosis between pancreatic cancer patients with  
33  
34 high and low level of TF expression or activity.  
35  
36  
37  
38  
39  
40  
41

### 42 **Outcomes**

43  
44 The study is included if it reports survival endpoints and provides the relationship  
45  
46 between TF and clinicopathological features, such as VTE, tumor embolus, primary  
47  
48 tumour size, clinical stage, and differentiation. The study should also provide  
49  
50 sufficient information to estimate the hazard ratio (HR).  
51  
52  
53  
54  
55

### 56 **Studies**

57  
58 Any prospective or retrospective published studies which evaluate the relationship  
59  
60

1  
2  
3  
4 between TF and pancreatic cancer are included. There is no limitation regarding the  
5  
6 number of participants. Only studies published in English were included.  
7  
8  
9

### 10 **Information sources**

11  
12  
13 We will search the Medline, Embase, and Cochrane Library from inception to Jan  
14  
15  
16 2020.  
17

### 18 **Search strategy**

19  
20  
21 Two reviewers search the Medline, EMBASE and Cochrane using a combination of  
22  
23  
24 subject terms with free-text terms. The following search words are adopted for each  
25  
26  
27 database: (pancreas or pancrea\* or pancreas [MeSh]) and (carcinoma [MeSh] or  
28  
29  
30 adenocarcinoma [MeSh] or carcinoma, ductal [MeSh] or neoplasms [MeSh] or  
31  
32  
33 cancer\* or carcin\* or neoplas\* or tumo\* or cyst\* or growth\* or adenocarcin\* or  
34  
35  
36 malig\*) and (tissue factor or CD142 antigens or coagulation factor III or  
37  
38  
39 thromboplastin [MeSh]). Reference lists of eligible studies and relevant review  
40  
41  
42 articles are also hand-searched to identify any potentially eligible studies that are  
43  
44  
45 recorded in the databases. We will also search in Google Scholar to identify any grey  
46  
47  
48 literatures.  
49

### 50 **Study records**

### 51 **Data management**

52  
53  
54 All study records are processed through EndNote X9, which can identify and remove  
55  
56  
57 duplicates. All extracted data are stored in a Microsoft Excel spreadsheet.  
58  
59  
60

### **Study selection and data collection process**

Two reviewers independently screen first the titles and abstracts of all retrieved articles after removing duplicates, and then the full texts of the selected articles. Disagreements are resolved by face-to-face discussion, or in case of persistent disagreement, a third researcher will be consulted. The same reviewers extract the data of included studies based on a predefined data extraction form.

### **Data items**

The data extracted include author, publication year, country, study design, number of participants, follow-up period, baseline and clinicopathological information of patients, survival outcomes, hazard ratio (HR), and 95% confidence interval (CI) related to TF expression. In addition, methods for statistical analysis, summary statistics, and items associated with a risk of bias are also summarized.

### **Risk of bias in individual studies**

Two researchers will independently assess the quality of the each included study using the Newcastle-Ottawa Scale (NOS score).<sup>29</sup> Scores of the NOS are split into three aspects: object selection, inter-group comparability, and outcome measurement. It is generally considered that an article with a score 0–5 point(s) is of low quality, and the article with a score >6 is considered high-quality.

### **Data synthesis**

All statistical tests are calculated with RevMan 5.3. The hazard ratio (HR) and 95%

1  
2  
3  
4 CI of each study are used to assess the relationship between the expression of TF and  
5  
6 the prognosis. The association between TF expression and clinicopathological  
7  
8 features is calculated using the pooled odds ratio (OR) and 95% CI. The HR and 95%  
9  
10 CI of each study are directly extracted from the original published study. The method  
11  
12 from Tierney et al<sup>30</sup> is used to extract the data or conduct a variable transformation if  
13  
14 the studies do not directly provide HR and 95% CI. For example, some studies  
15  
16 provide only the survival curve. The HR and 95% CI of each study are finally  
17  
18 combined using the method of generic inverse variance in RevMan software, so the ln  
19  
20 (HR) and SEln (HR) will be calculated in advance based on the data extracted. The  
21  
22 level of statistical significance is set at the 5%. If a meta-analysis is not appropriate  
23  
24 because of small number of studies or concerns regarding substantial variability, the  
25  
26 result will only be reported qualitatively. The heterogeneity is assessed using the I<sup>2</sup>  
27  
28 statistic. We will utilize the fixed effect model when the effects are assumed to be  
29  
30 homogenous ( $p > 0.05$ , I<sup>2</sup> 50%) and the random effect model when they are  
31  
32 heterogeneous ( $p < 0.05$ , I<sup>2</sup> 50%). To explore the source of heterogeneity, subgroup  
33  
34 analysis is considered. Sensitivity analysis will also be conducted and will be focused  
35  
36 on studies with a low risk of bias.  
37  
38  
39  
40  
41  
42  
43  
44  
45  
46  
47  
48  
49

### 50 **Meta-biases**

51  
52 Reporting bias will be explored graphically by a funnel plot and statistically by the  
53  
54 Egger's test<sup>31</sup> if 10 or more studies are available.  $P < 0.05$  is considered to indicate  
55  
56 publication bias.  
57  
58  
59  
60

## **Confidence in cumulative evidence**

The Grades of Recommendation, Assessment, Development and Evaluation method is applied to assess the level of evidence obtained from this systematic review.<sup>32</sup>

## **Patient and Public Involvement**

No patient involved.

## **Discussion**

Studies have shown that TF is closely related to the clinicopathological features and prognosis of pancreatic cancer.<sup>13,26,28</sup> Nevertheless, no systematic review on the association of different types TF expression with pancreatic cancer patients have been published in English. Thus, we plan to conduct a systematic review and meta-analysis on this topic. We hope that the results of this review will provide researchers and clinicians with more convincing evidence on whether TF is a potential biomarker of thrombotic risk and prognostic factor, and thereby promote the development of individualized diagnosis and treatment of pancreatic cancer patients.

## **Funding**

This study was supported by National Natural Science Foundation of China (No. 81670594, 81470791, 81376597), Gansu Basic Research Innovation Group Project (No. 1606RJIA328), Gansu Scientific Research of Health Services Project (No. GSWSKY2017-09), Talents Innovation and Entrepreneurship Program of Lanzhou City (No. 2017-RC-62), Talent Staff Fund of the Second Hospital of Lanzhou

1  
2  
3  
4 University (No. ynyjrckyzx2015-1-01), Cuiying Scientific and Technological  
5  
6 Innovation Program of Lanzhou University Second Hospital (No. CY2017-ZD01,  
7  
8 CY2019-BJ09) and Fundamental Research Funds for the Central  
9  
10 Universities(lzujbky-2016-k16, lzujbky-2017-79).  
11  
12  
13  
14  
15  
16

### 17 **Competing interest**

18  
19 None declared  
20  
21  
22  
23

### 24 **Authors' contribution**

25  
26  
27 HYL and HC conceived the idea and planned the entire methods to undertake it. HYL  
28  
29 and YY wrote the manuscript of this protocol. YY, QLS, XPC and PZ designed the  
30  
31 search strategy and planned the data extraction. DFW, PXT, BHG, XML, TZ, LX,  
32  
33  
34  
35  
36  
37  
38  
39  
40  
41  
42  
43  
44  
45  
46  
47  
48  
49  
50  
51  
52  
53  
54  
55  
56  
57  
58  
59  
60  
61  
62  
63  
64  
65  
66  
67  
68  
69  
70  
71  
72  
73  
74  
75  
76  
77  
78  
79  
80  
81  
82  
83  
84  
85  
86  
87  
88  
89  
90  
91  
92  
93  
94  
95  
96  
97  
98  
99  
100  
101  
102  
103  
104  
105  
106  
107  
108  
109  
110  
111  
112  
113  
114  
115  
116  
117  
118  
119  
120  
121  
122  
123  
124  
125  
126  
127  
128  
129  
130  
131  
132  
133  
134  
135  
136  
137  
138  
139  
140  
141  
142  
143  
144  
145  
146  
147  
148  
149  
150  
151  
152  
153  
154  
155  
156  
157  
158  
159  
160  
161  
162  
163  
164  
165  
166  
167  
168  
169  
170  
171  
172  
173  
174  
175  
176  
177  
178  
179  
180  
181  
182  
183  
184  
185  
186  
187  
188  
189  
190  
191  
192  
193  
194  
195  
196  
197  
198  
199  
200  
201  
202  
203  
204  
205  
206  
207  
208  
209  
210  
211  
212  
213  
214  
215  
216  
217  
218  
219  
220  
221  
222  
223  
224  
225  
226  
227  
228  
229  
230  
231  
232  
233  
234  
235  
236  
237  
238  
239  
240  
241  
242  
243  
244  
245  
246  
247  
248  
249  
250  
251  
252  
253  
254  
255  
256  
257  
258  
259  
260  
261  
262  
263  
264  
265  
266  
267  
268  
269  
270  
271  
272  
273  
274  
275  
276  
277  
278  
279  
280  
281  
282  
283  
284  
285  
286  
287  
288  
289  
290  
291  
292  
293  
294  
295  
296  
297  
298  
299  
300  
301  
302  
303  
304  
305  
306  
307  
308  
309  
310  
311  
312  
313  
314  
315  
316  
317  
318  
319  
320  
321  
322  
323  
324  
325  
326  
327  
328  
329  
330  
331  
332  
333  
334  
335  
336  
337  
338  
339  
340  
341  
342  
343  
344  
345  
346  
347  
348  
349  
350  
351  
352  
353  
354  
355  
356  
357  
358  
359  
360  
361  
362  
363  
364  
365  
366  
367  
368  
369  
370  
371  
372  
373  
374  
375  
376  
377  
378  
379  
380  
381  
382  
383  
384  
385  
386  
387  
388  
389  
390  
391  
392  
393  
394  
395  
396  
397  
398  
399  
400  
401  
402  
403  
404  
405  
406  
407  
408  
409  
410  
411  
412  
413  
414  
415  
416  
417  
418  
419  
420  
421  
422  
423  
424  
425  
426  
427  
428  
429  
430  
431  
432  
433  
434  
435  
436  
437  
438  
439  
440  
441  
442  
443  
444  
445  
446  
447  
448  
449  
450  
451  
452  
453  
454  
455  
456  
457  
458  
459  
460  
461  
462  
463  
464  
465  
466  
467  
468  
469  
470  
471  
472  
473  
474  
475  
476  
477  
478  
479  
480  
481  
482  
483  
484  
485  
486  
487  
488  
489  
490  
491  
492  
493  
494  
495  
496  
497  
498  
499  
500  
501  
502  
503  
504  
505  
506  
507  
508  
509  
510  
511  
512  
513  
514  
515  
516  
517  
518  
519  
520  
521  
522  
523  
524  
525  
526  
527  
528  
529  
530  
531  
532  
533  
534  
535  
536  
537  
538  
539  
540  
541  
542  
543  
544  
545  
546  
547  
548  
549  
550  
551  
552  
553  
554  
555  
556  
557  
558  
559  
560  
561  
562  
563  
564  
565  
566  
567  
568  
569  
570  
571  
572  
573  
574  
575  
576  
577  
578  
579  
580  
581  
582  
583  
584  
585  
586  
587  
588  
589  
590  
591  
592  
593  
594  
595  
596  
597  
598  
599  
600  
601  
602  
603  
604  
605  
606  
607  
608  
609  
610  
611  
612  
613  
614  
615  
616  
617  
618  
619  
620  
621  
622  
623  
624  
625  
626  
627  
628  
629  
630  
631  
632  
633  
634  
635  
636  
637  
638  
639  
640  
641  
642  
643  
644  
645  
646  
647  
648  
649  
650  
651  
652  
653  
654  
655  
656  
657  
658  
659  
660  
661  
662  
663  
664  
665  
666  
667  
668  
669  
670  
671  
672  
673  
674  
675  
676  
677  
678  
679  
680  
681  
682  
683  
684  
685  
686  
687  
688  
689  
690  
691  
692  
693  
694  
695  
696  
697  
698  
699  
700  
701  
702  
703  
704  
705  
706  
707  
708  
709  
710  
711  
712  
713  
714  
715  
716  
717  
718  
719  
720  
721  
722  
723  
724  
725  
726  
727  
728  
729  
730  
731  
732  
733  
734  
735  
736  
737  
738  
739  
740  
741  
742  
743  
744  
745  
746  
747  
748  
749  
750  
751  
752  
753  
754  
755  
756  
757  
758  
759  
760  
761  
762  
763  
764  
765  
766  
767  
768  
769  
770  
771  
772  
773  
774  
775  
776  
777  
778  
779  
780  
781  
782  
783  
784  
785  
786  
787  
788  
789  
790  
791  
792  
793  
794  
795  
796  
797  
798  
799  
800  
801  
802  
803  
804  
805  
806  
807  
808  
809  
810  
811  
812  
813  
814  
815  
816  
817  
818  
819  
820  
821  
822  
823  
824  
825  
826  
827  
828  
829  
830  
831  
832  
833  
834  
835  
836  
837  
838  
839  
840  
841  
842  
843  
844  
845  
846  
847  
848  
849  
850  
851  
852  
853  
854  
855  
856  
857  
858  
859  
860  
861  
862  
863  
864  
865  
866  
867  
868  
869  
870  
871  
872  
873  
874  
875  
876  
877  
878  
879  
880  
881  
882  
883  
884  
885  
886  
887  
888  
889  
890  
891  
892  
893  
894  
895  
896  
897  
898  
899  
900  
901  
902  
903  
904  
905  
906  
907  
908  
909  
910  
911  
912  
913  
914  
915  
916  
917  
918  
919  
920  
921  
922  
923  
924  
925  
926  
927  
928  
929  
930  
931  
932  
933  
934  
935  
936  
937  
938  
939  
940  
941  
942  
943  
944  
945  
946  
947  
948  
949  
950  
951  
952  
953  
954  
955  
956  
957  
958  
959  
960  
961  
962  
963  
964  
965  
966  
967  
968  
969  
970  
971  
972  
973  
974  
975  
976  
977  
978  
979  
980  
981  
982  
983  
984  
985  
986  
987  
988  
989  
990  
991  
992  
993  
994  
995  
996  
997  
998  
999  
1000



## References

1. Ferlay J, Soerjomataram I, Dikshit R, et al. Cancer incidence and mortality worldwide: sources, methods and major patterns in GLOBOCAN 2012. *Int J Cancer*. 2015;136(5):E359-386.
2. Rahib L, Smith BD, Aizenberg R, Rosenzweig AB, Fleshman JM, Matrisian LM. Projecting cancer incidence and deaths to 2030: the unexpected burden of thyroid, liver, and pancreas cancers in the United States. *Cancer Res*. 2014;74(11):2913-2921.
3. Chu LC, Goggins MG, Fishman EK. Diagnosis and Detection of Pancreatic Cancer. *Cancer J*. 2017;23(6):333-342.
4. Sproul EE. Carcinoma and Venous Thrombosis: The Frequency of Association of Carcinoma in the Body or Tail of the Pancreas with Multiple Venous Thrombosis. *American Journal of Cancer*. 1938;34.
5. Khorana AA, Fine RL. Pancreatic cancer and thromboembolic disease. *Lancet Oncol*. 2004;5(11):655-663.
6. Unruh D, Sagin F, Adam M, et al. Levels of Alternatively Spliced Tissue Factor in the Plasma of Patients with Pancreatic Cancer May Help Predict Aggressive Tumor Phenotype. *Ann Surg Oncol*. 2015;22 Suppl 3:S1206-1211.
7. Davila M, Robles-Carrillo L, Unruh D, et al. Microparticle association and heterogeneity of tumor-derived tissue factor in plasma: is it important for coagulation activation? *J Thromb Haemost*. 2014;12(2):186-196.
8. Bharthuar A, Khorana AA, Hutson A, et al. Circulating microparticle tissue factor, thromboembolism and survival in pancreaticobiliary cancers. *Thromb Res*. 2013;132(2):180-184.

- 1  
2  
3  
4 9. Boone BA, Zenati MS, Rieser C, et al. Risk of Venous Thromboembolism for Patients with  
5  
6  
7 Pancreatic Ductal Adenocarcinoma Undergoing Preoperative Chemotherapy Followed by Surgical  
8  
9  
10 Resection. *Ann Surg Oncol*. 2019;26(5):1503-1511.
- 11  
12 10. Mier-Hicks A, Raj M, Do RK, et al. Incidence, Management, and Implications of Visceral  
13  
14  
15 Thrombosis in Pancreatic Ductal Adenocarcinoma. *Clin Colorectal Cancer*. 2018;17(2):121-128.
- 16  
17 11. Nemerson Y. Tissue factor and hemostasis. *Blood*. 1988;71(1):1-8.
- 18  
19 12. Haas SL, Jesnowski R, Steiner M, et al. Expression of tissue factor in pancreatic adenocarcinoma  
20  
21  
22 is associated with activation of coagulation. *World J Gastroenterol*. 2006;12(30):4843-4849.
- 23  
24 13. Khorana AA, Ahrendt SA, Ryan CK, et al. Tissue factor expression, angiogenesis, and thrombosis  
25  
26  
27 in pancreatic cancer. *Clin Cancer Res*. 2007;13(10):2870-2875.
- 28  
29 14. Khorana AA, Francis CW, Menzies KE, et al. Plasma tissue factor may be predictive of venous  
30  
31  
32 thromboembolism in pancreatic cancer. *J Thromb Haemost*. 2008;6(11):1983-1985.
- 33  
34 15. Wang JG, Geddings JE, Aleman MM, et al. Tumor-derived tissue factor activates coagulation and  
35  
36  
37 enhances thrombosis in a mouse xenograft model of human pancreatic cancer.  
38  
39  
40 *Blood*;119(23):5543-5552.
- 41  
42 16. Tesselaar MET, ROMIJN FPHTM, LINDEN IKVD, PRINS FA, BERTINA RM, OSANTO S.  
43  
44  
45 Microparticle-associated tissue factor activity: a link between cancer and thrombosis? *Journal of*  
46  
47  
48 *Thrombosis & Haemostasis Jth*;5(3):520-527.
- 49  
50 17. Thaler J, AY C, MACKMAN N, et al. Microparticle-associated tissue factor activity, venous  
51  
52  
53 thromboembolism and mortality in pancreatic, gastric, colorectal and brain cancer patients. *Journal of*  
54  
55  
56 *Thrombosis & Haemostasis*;10(7):0-0.
- 57  
58 18. Zwicker JI, Liebman HA, Neuberg D, et al. Tumor-Derived Tissue Factor-Bearing Microparticles  
59  
60

1  
2  
3  
4 Are Associated With Venous Thromboembolic Events in Malignancy. *Clinical Cancer*  
5  
6  
7 *Research*;15(22):6830-6840.

8  
9 19. Bharthuar A, Khorana AA, Hutson A, et al. Circulating microparticle tissue factor,  
10  
11 thromboembolism and survival in pancreaticobiliary cancers. *Thrombosis Research*;132(2):180-184.

12  
13  
14 20. Milsom CC, Yu JL, Mackman N, et al. Tissue factor regulation by epidermal growth factor  
15  
16  
17 receptor and epithelial-to-mesenchymal transitions: effect on tumor initiation and angiogenesis. *Cancer*  
18  
19  
20 *Res.* 2008;68(24):10068-10076.

21  
22 21. Date K, Ettlai C, Maraveyas A. Tissue factor-bearing microparticles and inflammation: a  
23  
24  
25 potential mechanism for the development of venous thromboembolism in cancer. *J Thromb Haemost.*  
26  
27  
28 2017;15(12):2289-2299.

29  
30 22. Hu C, Huang L, Gest C, et al. Opposite regulation by PI3K/Akt and MAPK/ERK pathways of  
31  
32  
33 tissue factor expression, cell-associated procoagulant activity and invasiveness in MDA-MB-231 cells.  
34  
35  
36 *J Hematol Oncol.* 2012;5:16.

37  
38 23. Chanakira A, Westmark PR, Ong IM, Sheehan JP. Tissue factor-factor VIIa complex triggers  
39  
40  
41 protease activated receptor 2-dependent growth factor release and migration in ovarian cancer. *Gynecol*  
42  
43  
44 *Oncol.* 2017;145(1):167-175.

45  
46 24. Mueller BM, Reisfeld RA, Edgington TS, Ruf W. Expression of tissue factor by melanoma cells  
47  
48  
49 promotes efficient hematogenous metastasis. *Proc Natl Acad Sci U S A.* 1992;89(24):11832-11836.

50  
51 25. Kataoka H, Uchino H, Asada Y, et al. Analysis of tissue factor and tissue factor pathway inhibitor  
52  
53  
54 expression in human colorectal carcinoma cell lines and metastatic sublines to the liver. *Int J Cancer.*  
55  
56  
57 1997;72(5):878-884.

58  
59 26. Chen K, Li Z, Jiang P, et al. Co-expression of CD133, CD44v6 and human tissue factor is  
60

1  
2  
3  
4 associated with metastasis and poor prognosis in pancreatic carcinoma. *Oncol Rep.*  
5  
6 2014;32(2):755-763.  
7

8  
9 27. Kakkar AK, Lemoine NR, Scully MF, Tebbutt S, Williamson RCN. Tissue factor expression  
10  
11 correlates with histological grade in human pancreatic cancer. *British Journal of Surgery.*  
12  
13 1995;82(8):1101-1104.  
14  
15

16  
17 28. Nitori N, Ino Y, Nakanishi Y, et al. Prognostic significance of tissue factor in pancreatic ductal  
18  
19 adenocarcinoma. *Clin Cancer Res.* 2005;11(7):2531-2539.  
20  
21

22  
23 29. Stang A. Critical evaluation of the Newcastle-Ottawa scale for the assessment of the quality of  
24  
25 nonrandomized studies in meta-analyses. *European journal of epidemiology.* 2010;25(9):603-605.  
26  
27

28  
29 30. Tierney JF, Stewart LA, Ghersi D, Burdett S, Sydes MR. Practical methods for incorporating  
30  
31 summary time-to-event data into meta-analysis. *Trials.* 2007;8(1):16.  
32  
33

34  
35 31. Duval S, Tweedie R. Trim and fill: a simple funnel-plot-based method of testing and adjusting for  
36  
37 publication bias in meta-analysis. *Biometrics.* 2000;56(2):455-463.  
38  
39

40  
41 32. Iorio A, Spencer FA, Falavigna M, et al. Use of GRADE for assessment of evidence about  
42  
43 prognosis: rating confidence in estimates of event rates in broad categories of patients. *bmj.*  
44  
45 2015;350:h870.  
46  
47  
48  
49  
50  
51  
52  
53  
54  
55  
56  
57  
58  
59  
60

# BMJ Open

## Prognostic significance of tissue factor in patients with pancreatic cancer: a systematic review protocol

|                               |                                                                                                                                                                                                                                                                                                                                                                                                                                                                                                                                                                                                                                                                                                                                                                                                                                                                                                                                                                                                                                                                                                                                                                                                                                                                                                                                                                                                                                                                                                                                                                                                                                                                                                                                                                                                                                                                                                                                                                                                                                                                                                                                                 |
|-------------------------------|-------------------------------------------------------------------------------------------------------------------------------------------------------------------------------------------------------------------------------------------------------------------------------------------------------------------------------------------------------------------------------------------------------------------------------------------------------------------------------------------------------------------------------------------------------------------------------------------------------------------------------------------------------------------------------------------------------------------------------------------------------------------------------------------------------------------------------------------------------------------------------------------------------------------------------------------------------------------------------------------------------------------------------------------------------------------------------------------------------------------------------------------------------------------------------------------------------------------------------------------------------------------------------------------------------------------------------------------------------------------------------------------------------------------------------------------------------------------------------------------------------------------------------------------------------------------------------------------------------------------------------------------------------------------------------------------------------------------------------------------------------------------------------------------------------------------------------------------------------------------------------------------------------------------------------------------------------------------------------------------------------------------------------------------------------------------------------------------------------------------------------------------------|
| Journal:                      | <i>BMJ Open</i>                                                                                                                                                                                                                                                                                                                                                                                                                                                                                                                                                                                                                                                                                                                                                                                                                                                                                                                                                                                                                                                                                                                                                                                                                                                                                                                                                                                                                                                                                                                                                                                                                                                                                                                                                                                                                                                                                                                                                                                                                                                                                                                                 |
| Manuscript ID                 | bmjopen-2020-037431.R1                                                                                                                                                                                                                                                                                                                                                                                                                                                                                                                                                                                                                                                                                                                                                                                                                                                                                                                                                                                                                                                                                                                                                                                                                                                                                                                                                                                                                                                                                                                                                                                                                                                                                                                                                                                                                                                                                                                                                                                                                                                                                                                          |
| Article Type:                 | Protocol                                                                                                                                                                                                                                                                                                                                                                                                                                                                                                                                                                                                                                                                                                                                                                                                                                                                                                                                                                                                                                                                                                                                                                                                                                                                                                                                                                                                                                                                                                                                                                                                                                                                                                                                                                                                                                                                                                                                                                                                                                                                                                                                        |
| Date Submitted by the Author: | 11-May-2020                                                                                                                                                                                                                                                                                                                                                                                                                                                                                                                                                                                                                                                                                                                                                                                                                                                                                                                                                                                                                                                                                                                                                                                                                                                                                                                                                                                                                                                                                                                                                                                                                                                                                                                                                                                                                                                                                                                                                                                                                                                                                                                                     |
| Complete List of Authors:     | <p>Li, Haiyuan ; The Department of Tumor Surgery, Lanzhou University Second Hospital, ; The Second Clinical Medical College, Lanzhou University,</p> <p>Yu, Yang ; The Department of Tumor Surgery, Lanzhou University Second Hospital; The Second Clinical Medical College, Lanzhou University,</p> <p>Shi, Qianling ; The First Clinical Medical College, Lanzhou University, The First Clinical Medical College of Lanzhou University</p> <p>Chen, Xueping ; Sleep Medicine Center, Gansu Provincial Hospital</p> <p>Zheng, Peng; The Department of Tumor Surgery, Lanzhou University Second Hospital; The Second Clinical Medical College, Lanzhou University,</p> <p>Wang, Dengfeng ; The Department of Tumor Surgery, Lanzhou University Second Hospital; The Second Clinical Medical College, Lanzhou University,</p> <p>Tao, Pengxian ; The Department of Tumor Surgery, Lanzhou University Second Hospital; The Second Clinical Medical College, Lanzhou University,</p> <p>Gu, Baohong ; The Department of Tumor Surgery, Lanzhou University Second Hospital; The Second Clinical Medical College, Lanzhou University,</p> <p>Li, Xuemei ; The Department of Tumor Surgery, Lanzhou University Second Hospital; The Second Clinical Medical College, Lanzhou University,</p> <p>Zhang, Tao; The Department of Tumor Surgery, Lanzhou University Second Hospital; The Second Clinical Medical College, Lanzhou University,</p> <p>Xiang, Lin ; The Department of Tumor Surgery, Lanzhou University Second Hospital; The Second Clinical Medical College, Lanzhou University,</p> <p>Xi, Dayong ; The Department of Tumor Surgery, Lanzhou University Second Hospital; The Second Clinical Medical College, Lanzhou University,</p> <p>Gao, Lei ; The Department of Tumor Surgery, Lanzhou University Second Hospital; The Second Clinical Medical College, Lanzhou University,</p> <p>Maswikiti Ewetse , Paul; The Department of Tumor Surgery, Lanzhou University Second Hospital; The Second Clinical Medical College, Lanzhou University,</p> <p>Chen, Hao; The Department of Tumor Surgery, Lanzhou University Second Hospital</p> |

1  
2  
3  
4  
5  
6  
7  
8  
9  
10  
11  
12  
13  
14  
15  
16  
17  
18  
19  
20  
21  
22  
23  
24  
25  
26  
27  
28  
29  
30  
31  
32  
33  
34  
35  
36  
37  
38  
39  
40  
41  
42  
43  
44  
45  
46  
47  
48  
49  
50  
51  
52  
53  
54  
55  
56  
57  
58  
59  
60

|                                   |                                                                                                                   |
|-----------------------------------|-------------------------------------------------------------------------------------------------------------------|
| <b>Primary Subject Heading:</b>   | Evidence based practice                                                                                           |
| <b>Secondary Subject Heading:</b> | Oncology, Gastroenterology and hepatology, Patient-centred medicine                                               |
| <b>Keywords:</b>                  | Gastrointestinal tumours < ONCOLOGY, Pancreatic disease < GASTROENTEROLOGY, Molecular biology < TROPICAL MEDICINE |
|                                   |                                                                                                                   |

SCHOLARONE™  
Manuscripts



I, the Submitting Author has the right to grant and does grant on behalf of all authors of the Work (as defined in the below author licence), an exclusive licence and/or a non-exclusive licence for contributions from authors who are: i) UK Crown employees; ii) where BMJ has agreed a CC-BY licence shall apply, and/or iii) in accordance with the terms applicable for US Federal Government officers or employees acting as part of their official duties; on a worldwide, perpetual, irrevocable, royalty-free basis to BMJ Publishing Group Ltd ("BMJ") its licensees and where the relevant Journal is co-owned by BMJ to the co-owners of the Journal, to publish the Work in this journal and any other BMJ products and to exploit all rights, as set out in our [licence](#).

The Submitting Author accepts and understands that any supply made under these terms is made by BMJ to the Submitting Author unless you are acting as an employee on behalf of your employer or a postgraduate student of an affiliated institution which is paying any applicable article publishing charge ("APC") for Open Access articles. Where the Submitting Author wishes to make the Work available on an Open Access basis (and intends to pay the relevant APC), the terms of reuse of such Open Access shall be governed by a Creative Commons licence – details of these licences and which [Creative Commons](#) licence will apply to this Work are set out in our licence referred to above.

Other than as permitted in any relevant BMJ Author's Self Archiving Policies, I confirm this Work has not been accepted for publication elsewhere, is not being considered for publication elsewhere and does not duplicate material already published. I confirm all authors consent to publication of this Work and authorise the granting of this licence.

---

1  
2  
3  
4 **1 Prognostic significance of tissue factor in patients with**  
5  
6 **2 pancreatic cancer: a systematic review protocol**  
7  
8

9 Haiyuan Li<sup>1,2#</sup>, Yang Yu<sup>1,2#</sup>, Qianling Shi<sup>3</sup>, Xueping Chen<sup>4</sup>, Peng Zheng<sup>1,2</sup>, Dengfeng  
10  
11 Wang<sup>1,2</sup>, Pengxian Tao<sup>1,2</sup>, Baohong Gu<sup>1,2</sup>, Xuemei Li<sup>1,2</sup>, Tao Zhang<sup>1,2</sup>, Lin Xiang<sup>1,2</sup>,  
12  
13 Dayong Xi<sup>1,2</sup>, Lei Gao<sup>1,2</sup>, Paul Maswikiti Ewetse<sup>1,2</sup>, Hao Chen<sup>1\*</sup>  
14  
15

16  
17 1. The Department of Tumour Surgery, Lanzhou University Second Hospital,  
18  
19 Lanzhou 730030, China;  
20  
21

22 2. The Second Clinical Medical College, Lanzhou University, Lanzhou 730030,  
23  
24 China;  
25  
26

27 3. The First Clinical Medical College, Lanzhou University, Lanzhou 730000, China;  
28  
29

30 4. Sleep Medicine Center, Gansu Provincial Hospital, Lanzhou 730000, China;  
31  
32

33 # Haiyuan Li and Yang Yu contributed equally; Haiyuan Li and Yang Yu are joint  
34  
35 first authors  
36  
37

38 \* Corresponding Author: Hao Chen, MD, PhD, the Department of Tumor Surgery,  
39  
40 Lanzhou University Second Hospital, Lanzhou 730030, China;  
41  
42 Tel: +86-15009467790; E-mail: [chenhaodrs@163.com](mailto:chenhaodrs@163.com).  
43  
44  
45  
46  
47  
48  
49  
50  
51  
52  
53  
54  
55  
56  
57  
58  
59  
60



23

**Abstract**

**Introduction:** Pancreatic cancer is a highly aggressive digestive system tumour with poor prognosis. Venous thromboembolism (VTE) is a well-known complication of pancreatic cancer, and tissue factor (TF) contributes to the generation of a hypercoagulable state and thrombotic disease in pancreatic cancer. Several studies showed that an elevated TF level was related to the development of VTE and influenced the survival of pancreatic cancer patients. Thus, we wish to conduct a systematic review of literature to clarify the prognostic significance of TF in pancreatic cancer.

**Methods and analysis:** Studies comparing the circulating microparticle-associated MP TF level between pancreatic cancer patients with and without VTE will be included to evaluate the roles of TF in VTE development. Studies comparing the survival data between patients with high TF expression and low TF expression will also be included to explore the association of TF expression with patient survival. The outcomes are plasma MP TF level and survival endpoints (overall and progression-free survival), respectively. Primary studies of any type published in English will be included. Two reviewers will search Medline, EMBASE and Cochrane databases from inception to June 2020, retrieve relevant studies, and independently select the literatures and extract data from the included studies. The quality of each included study will be assessed by the Newcastle-Ottawa Scale (NOS score). The HR and 95% CI of each study will be pooled for survival outcome, and

---

1  
2  
3  
4 45 the standardized mean difference with 95% confidence intervals will be used for  
5  
6 46 continuous outcomes. If meta-analysis is inappropriate, the result will only be  
7  
8  
9 47 reported qualitatively. Subgroup and sensitivity analyses will be considered to  
10  
11 48 identify sources of heterogeneity. The Grades of Recommendation, Assessment,  
12  
13  
14 49 Development and Evaluation method will be applied to assess the level of evidence of  
15  
16  
17 50 this systematic review.

18  
19  
20 51 **Ethics and dissemination:** There are no concerning ethical issues. The results will be  
21  
22  
23 52 published.

24  
25  
26 53 **PROSPERO registration number:** CRD42019133665

27  
28  
29  
30 54 **Key words:** pancreatic cancer; tissue factor; microvesicle; prognosis; systematic  
31  
32  
33 55 review

34  
35  
36 56

37  
38  
39  
40  
41 57

42  
43  
44  
45  
46 58

47  
48  
49  
50  
51 59

52  
53  
54  
55 60

56  
57  
58  
59  
60 61

1  
2  
3  
4 62  
5  
6  
7

8 **63 Strengths and limitations of this study**

- 9  
10  
11  
12 64 ● A detailed and completed search strategy will be used to collect potentially  
13  
14 65 eligible studies.  
15  
16  
17  
18 66 ● Sources of heterogeneity will be carefully considered, and multiple solutions will  
19  
20  
21 67 be considered.  
22  
23  
24  
25 68 ● The included literature will be limited to studies published in English.  
26  
27  
28  
29 69 ● Heterogeneity among the TF measuring methods may exist.  
30  
31  
32  
33  
34 70 ● The findings are potentially subject to publication bias.  
35  
36  
37  
38  
39  
40  
41  
42  
43  
44  
45  
46  
47  
48  
49  
50  
51  
52  
53  
54  
55  
56  
57  
58  
59  
60

---

## 72 INTRODUCTION

73 Pancreatic cancer is a type of highly aggressive digestive system tumour with poor  
74 prognosis.<sup>1</sup> It is estimated that pancreatic cancer will be the second largest  
75 cancer-related cause of death in the United States by 2030.<sup>2</sup> Pancreatic cancer has  
76 insidious onset, rapid progression, low rate of early diagnosis and radical resection.<sup>3</sup>  
77 Most of the patients already have advanced or distant metastasis at the first diagnosis.  
78 Despite recent advances in surgical techniques as well as chemotherapy and radiation  
79 therapy, pancreatic cancer patients still has a dismal 5-year survival rate.<sup>3</sup>

80 Venous thromboembolism (VTE), associated with the generation of an intrinsic  
81 hypercoagulable state, is a well-known complication of malignant tumour. Sproul first  
82 discovered that pancreatic cancer patients are prone to VTE in 1938.<sup>4</sup> Subsequently,  
83 the reported incidence of VTE in pancreatic cancer patients ranges from 17% to 57%.<sup>5</sup>  
84 Several factors and pathological mechanisms contribute to the generation of a  
85 hypercoagulable state and VTE in pancreatic cancer.<sup>6</sup> Of prime importance is tissue  
86 factor (TF), a single chain transmembrane-receptor glycoprotein with a molecular  
87 weight of approximately 47 kDa, which initiates the extrinsic pathway of  
88 coagulation.<sup>7</sup> In recent years, it was reported that TF is expressed in many malignant  
89 tumour tissues, including pancreatic cancer, leading to increased blood coagulability  
90 and a high risk of VTE.<sup>8,9</sup> In addition, high level of the plasma TF was detected in  
91 patients with pancreatic cancer.<sup>10</sup> Pancreatic cancer cells express TF and release  
92 microparticle-associated TF (MP TF) into blood.<sup>11,12</sup>

1  
2  
3  
4 93 Several studies have found that thrombosis and diffuse intravascular coagulation are  
5  
6 94 associated with poor prognosis in patients with pancreatic cancer.<sup>13-17</sup> Meanwhile,  
7  
8  
9 95 substantial evidence indicated that TF is of predictive value in the biologic features of  
10  
11  
12 96 tumours and the survival of patients. It was found that TF plays an important role in  
13  
14 97 promoting angiogenesis,<sup>18</sup> inflammatory reaction,<sup>19</sup> tumour invasion,<sup>20</sup> and  
15  
16  
17 98 metastasis.<sup>21</sup> Compared with tumour cells with a higher degree of differentiation in  
18  
19  
20 99 pancreatic cancer, tumour cells with lower degree of differentiation seem to have  
21  
22 100 higher TF expression and associated with decreased overall survival.<sup>9 22-24</sup> Therefore,  
23  
24  
25 101 we hypothesize that the elevated circulating TF level may contribute to the  
26  
27  
28 102 development of VTE, and TF expression in tumour tissue may be associated with  
29  
30  
31 103 poor prognosis in patients with pancreatic cancer. To test this hypothesis, we plan to  
32  
33  
34 104 undertake a systematic review of previous studies assessing the association between  
35  
36  
37 105 TF and pancreatic cancer.  
38  
39  
40  
41  
42  
43  
44  
45  
46  
47  
48  
49  
50  
51  
52  
53  
54  
55  
56  
57  
58  
59  
60

## 108 **METHODS AND ANALYSIS**

### 109 **Objective of the review**

110 This review aims to clarify the prognostic significance of TF in pancreatic cancer.  
111 This review contains two sections. First, we will evaluate the association between  
112 circulating MP TF level and VTE. Second, we will explore the impact of TF  
113 expression on patients' survival.

### 114 **Registration**

---

1  
2  
3  
4 115 This protocol was registered with PROSPERO (International Prospective Register of  
5  
6 116 Systematic Reviews) (CRD42019133665)  
7  
8  
9

10  
11 117 **Eligibility criteria**  
12

13  
14 118 **Participants**  
15

16 119 Patients with pancreatic cancer are eligible for the review. The diagnosis will be  
17  
18 120 pathologically confirmed. There are no limitations on the stages, grades, and types of  
19  
20 121 pancreatic cancer. Patients will be excluded if they have primary haematological  
21  
22 122 system disease or other malignancies or receive transfusion therapy during the study  
23  
24 123 course.  
25  
26  
27  
28  
29

30  
31 124 **Exposure**  
32

33  
34 125 To evaluate the association between circulating MP TF level and VTE, pancreatic  
35  
36 126 cancer patients will be divided into two groups based on the presence or absence of  
37  
38 127 VTE. The MP TF level will be compared between two groups. There are no strict  
39  
40 128 restrictions on the diagnosis approach for VTE, and diagnosis by clinical assessment,  
41  
42 129 imaging, and D-dimer testing are all acceptable. To explore the impact of TF  
43  
44 130 expression on patients' survival, patients will be defined as groups of high TF  
45  
46 131 expression or low TF expression. Survival between different TF-expression groups  
47  
48 132 will be compared. The TF will be detected using immunohistochemistry analysis of  
49  
50 133 the tissue specimens.  
51  
52  
53  
54  
55  
56  
57  
58

59 134 **Outcomes**  
60

1  
2  
3  
4 135 According to different purpose, studies are eligible if they: a) individually report the  
5  
6 136 level of circulating MP TF of patients with VTE and without VTE; or b) report  
7  
8  
9 137 survival endpoints (including overall survival [OS] and progression free survival  
10  
11  
12 138 [PFS]) of patients in the groups of high TF expression and low TF expression. In  
13  
14 139 addition, the level of circulating MP TF is determined by flowcytometry or activity  
15  
16  
17 140 tests. The studies reporting survival data should also provide sufficient information to  
18  
19  
20 141 estimate the hazard ratio (HR).

## 21 22 23 24 142 **Studies**

25  
26 143 Any prospective or retrospective published studies which evaluate the relationship  
27  
28  
29 144 between TF and pancreatic cancer are included. There is no limitation regarding the  
30  
31  
32 145 number of participants. Only studies published in English were included.

## 33 34 35 36 146 **Information sources**

37  
38  
39 147 We will search the Medline, Embase, and Cochrane Library from inception to June  
40  
41  
42 148 2020.

## 43 44 45 46 149 **Search strategy**

47  
48  
49 150 Two reviewers search the Medline, EMBASE and Cochrane using a combination of  
50  
51  
52 151 subject terms with free-text terms. The following search words are adopted for each  
53  
54  
55 152 database: (pancreas or pancrea\* or pancreas [MeSh]) and (carcinoma [MeSh] or  
56  
57  
58 153 adenocarcinoma [MeSh] or carcinoma, ductal [MeSh] or neoplasms [MeSh] or  
59  
60 154 cancer\* or carcin\* or neoplas\* or tumo\* or cyst\* or growth\* or adenocarcin\* or

---

155 malig\*) and (tissue factor or TF expression or microparticle or TF-positive MP or  
156 TF+MP or TF-bearing MP or MP-associated or MP TF or microvesicle or TF-positive  
157 MV or TF+MV or TF-bearing MV or MV-associated or MV TF or CD142 antigens  
158 or coagulation factor III or thromboplastin [MeSh]). An example of the Medline  
159 search strategy is provided in the supplementary file. Reference lists of eligible  
160 studies and relevant review articles will also be hand-searched to identify any  
161 potentially eligible studies that are recorded in the databases. We will also search  
162 Google Scholar to identify any grey literature.

### 163 **Study records**

### 164 **Data management**

165 All study records will be processed through EndNote X9, which can identify and  
166 remove duplicates. All extracted data will be stored in a Microsoft Excel spreadsheet.

### 167 **Study selection and data collection process**

168 Two reviewers will independently screen first the titles and abstracts of all retrieved  
169 articles after removing duplicates, and then the full texts of the selected articles.

170 Disagreements will be resolved by face-to-face discussion, or in case of persistent  
171 disagreement, a third researcher will be consulted. The same reviewers will extract the  
172 data of included studies based on a predefined data extraction form.

### 173 **Data items**

174 The data extracted will include author, publication year, country, study design,



1  
2  
3  
4 175 number of participants, follow-up period, baseline and clinicopathological  
5  
6 176 information of patients, methods used to measure TF, circulating MP TF level related  
7  
8  
9 177 to VTE presence, OS and PFS (hazard ratio [HR], 95% confidence interval [CI])  
10  
11 178 related to TF expression. In addition, methods for statistical analysis, summary  
12  
13  
14 179 statistics, and items associated with a risk of bias will also be summarized.  
15  
16  
17  
18

### 19 180 **Risk of bias in individual studies**

20  
21 181 Two researchers will independently assess the quality of the each included study  
22  
23  
24 182 using the Newcastle-Ottawa Scale (NOS score).<sup>25</sup> Scores of the NOS are split into  
25  
26  
27 183 three aspects: object selection, inter-group comparability, and outcome measurement.  
28  
29 184 It is generally considered that an article with a score 0–5 point(s) is of low quality,  
30  
31  
32 185 and an article with a score >6 is of high quality.  
33  
34  
35

### 36 186 **Data synthesis**

37  
38  
39 187 All statistical tests are calculated with RevMan 5.3. The pooled standardized mean  
40  
41  
42 188 difference (SMD) with 95% confidence intervals (CI) will be used to compare the  
43  
44  
45 189 circulating MP TF level in VTE group and non-VTE group because the MP TF level  
46  
47  
48 190 reported in studies may have inconsistent units. The hazard ratio (HR) and 95% CI of  
49  
50  
51 191 each study will be used to evaluate the survival difference between groups with  
52  
53  
54 192 different strength of TF expression. The case number and mean and standard  
55  
56  
57 193 deviation (SD) of MP TF level are collected from included studies. The HR and 95%  
58  
59  
60 194 CI will first be extracted from the original published study. The method from Tierney  
195 et al<sup>26</sup> is used to extract the data or conduct a variable transformation if the studies do

1  
2  
3  
4 196 not directly provide HR and 95% CI. For example, some studies provide only the  
5  
6 197 survival curve. The HR and 95% CI of each study are finally combined using the  
7  
8  
9 198 method of generic inverse variance in RevMan software; therefore, the ln (HR) and  
10  
11 199 SEln (HR) will be calculated in advance based on the data extracted. The level of  
12  
13  
14 200 statistical significance is set at 5%. If a meta-analysis is not appropriate because of  
15  
16  
17 201 small number of studies or concerns regarding substantial variability, the result will  
18  
19 202 only be reported qualitatively. The heterogeneity will be assessed using the  $I^2$  statistic.  
20  
21  
22 203 We will utilize the fixed-effect model when the effects are assumed to be  
23  
24 204 homogenous ( $p > 0.05$ ,  $I^2 \leq 50\%$ ) and the random effect model when they are  
25  
26  
27 205 heterogeneous ( $p < 0.05$ ,  $I^2 \geq 50\%$ ). To explore the source of heterogeneity, subgroup  
28  
29 206 analysis will be performed according to the same regions, study design, types of  
30  
31  
32 207 tumour, and methods of measuring MP TF level. Sensitivity analysis will also be  
33  
34  
35 208 conducted and focused on studies with a low risk of bias.  
36  
37  
38  
39

#### 40 209 **Meta-biases**

41  
42 210 Reporting bias will be explored graphically by a funnel plot and statistically by the  
43  
44 211 Egger's test<sup>27</sup> if 10 or more studies are available.  $P < 0.05$  is considered to indicate  
45  
46  
47 212 publication bias.  
48  
49  
50  
51

#### 52 213 **Confidence in cumulative evidence**

53  
54 214 The Grades of Recommendation, Assessment, Development and Evaluation method is  
55  
56  
57 215 applied to assess the level of evidence obtained from this systematic review.<sup>28</sup>  
58  
59  
60

---

216 **Patient and Public Involvement**

217 No patients are involved.

218 **Discussion**

219 Studies have shown that TF is closely related to the VTE development and survival of  
220 patients with pancreatic cancer.<sup>9 22 24 29</sup> Nevertheless, no systematic review regarding  
221 the predictive value of plasma MP TF level and tissue TF expression strength on  
222 pancreatic cancer patients have been published in English. Thus, we plan to conduct a  
223 systematic review and meta-analysis on this topic. We hope that the results of this  
224 review will provide researchers and clinicians with more convincing evidence on  
225 whether TF is a potential biomarker of thrombotic risk and prognostic factor, and  
226 thereby promote the development of individualized diagnosis and treatment of  
227 pancreatic cancer patients. This article provides a detailed and complete description of  
228 the methodology of the review; however, some limitations may become apparent  
229 during the course of this review. First, only studies published in English will be  
230 included. The exclusion of non-English articles will negatively influence the  
231 representativeness of the results to a global population. Second, the inclusion criteria  
232 regarding the methods used to measure TF are not strict. Heterogeneity in the  
233 measuring methods will reduce the accuracy of results. Third, as with all systematic  
234 reviews and meta-analyses, there are potential risks of publication bias. Overall,  
235 regardless of the potential methodological deficiencies, we believe that each aspect of  
236 the review has been addressed and the protocol will help ensure study's integrity and

---

237 transparency.

238

239 **Ethics and dissemination**

240 This proposed systematic review and meta-analysis is based on published data, and no

241 information of an individual patient will be accessed and discussed in this review.

242 Therefore, ethical approval is not required. The results of this review will be sought

243 for publication in a peer-reviewed journal and relevant conference proceedings. Data

244 generated during the research will be available from the corresponding author on

245 reasonable request.

246

---

## 248 References

- 249 1. Ferlay J, Soerjomataram I, Dikshit R, et al. Cancer incidence and mortality  
250 worldwide: sources, methods and major patterns in GLOBOCAN 2012.  
251 *International journal of cancer* 2015;136:E359-86. doi: 10.1002/ijc.29210
- 252 2. Rahib L, Smith BD, Aizenberg R, et al. Projecting cancer incidence and deaths to  
253 2030: the unexpected burden of thyroid, liver, and pancreas cancers in the  
254 United States. *Cancer research* 2014;74:2913-21. doi:  
255 10.1158/0008-5472.can-14-0155
- 256 3. Chu LC, Goggins MG, Fishman EK. Diagnosis and Detection of Pancreatic  
257 Cancer. *Cancer journal (Sudbury, Mass)* 2017;23:333-42. doi:  
258 10.1097/ppo.0000000000000290
- 259 4. Sproul EE. Carcinoma and Venous Thrombosis: The Frequency of Association of  
260 Carcinoma in the Body or Tail of the Pancreas with Multiple Venous  
261 Thrombosis. *American Journal of Cancer* 1938;34
- 262 5. Khorana AA, Fine RL. Pancreatic cancer and thromboembolic disease. *The Lancet*  
263 *Oncology* 2004;5:655-63. doi: 10.1016/s1470-2045(04)01606-7
- 264 6. Campello E, Ilich A, Simioni P, et al. The relationship between pancreatic cancer  
265 and hypercoagulability: a comprehensive review on epidemiological and  
266 biological issues. *Br J Cancer* 2019;121:359-71. doi:  
267 10.1038/s41416-019-0510-x
- 268 7. Nemerson Y. Tissue factor and hemostasis. *Blood* 1988;71:1-8.
- 269 8. Haas SL, Jesnowski R, Steiner M, et al. Expression of tissue factor in pancreatic

- 
- 1  
2  
3  
4 270 adenocarcinoma is associated with activation of coagulation. *World J*  
5  
6 271 *Gastroenterol* 2006;12:4843-9.  
7  
8  
9 272 9. Khorana AA, Ahrendt SA, Ryan CK, et al. Tissue factor expression, angiogenesis,  
10  
11 273 and thrombosis in pancreatic cancer. *Clinical cancer research : an official*  
12  
13 274 *journal of the American Association for Cancer Research* 2007;13:2870-5.  
14  
15 275 doi: 10.1158/1078-0432.ccr-06-2351  
16  
17  
18  
19 276 10. Khorana AA, Francis CW, Menzies KE, et al. Plasma tissue factor may be  
20  
21 277 predictive of venous thromboembolism in pancreatic cancer. *Journal of*  
22  
23 278 *thrombosis and haemostasis : JTH* 2008;6:1983-5. doi:  
24  
25 279 10.1111/j.1538-7836.2008.03156.x  
26  
27  
28  
29 30 11. Wang JG, Geddings JE, Aleman MM, et al. Tumor-derived tissue factor activates  
31  
32 301 coagulation and enhances thrombosis in a mouse xenograft model of human  
33  
34 302 pancreatic cancer. *Blood*;119:5543-52.  
35  
36  
37 303 12. Tesselaar MET, ROMIJN FPHTM, LINDEN IKVD, et al.  
38  
39 304 Microparticle-associated tissue factor activity: a link between cancer and  
40  
41 305 thrombosis? *Journal of Thrombosis & Haemostasis Jth*;5:520-27.  
42  
43  
44 306 13. Unruh D, Sagin F, Adam M, et al. Levels of Alternatively Spliced Tissue Factor in  
45  
46 307 the Plasma of Patients with Pancreatic Cancer May Help Predict Aggressive  
47  
48 308 Tumor Phenotype. *Annals of surgical oncology* 2015;22 Suppl 3:S1206-11.  
49  
50 309 doi: 10.1245/s10434-015-4592-2  
51  
52  
53  
54 310 14. Davila M, Robles-Carrillo L, Unruh D, et al. Microparticle association and  
55  
56 311 heterogeneity of tumor-derived tissue factor in plasma: is it important for  
57  
58  
59  
60

- 
- 1  
2  
3  
4 292 coagulation activation? *Journal of thrombosis and haemostasis : JTH*  
5  
6 293 2014;12:186-96. doi: 10.1111/jth.12475  
7  
8  
9 294 15. Bharthuar A, Khorana AA, Hutson A, et al. Circulating microparticle tissue factor,  
10  
11 295 thromboembolism and survival in pancreaticobiliary cancers. *Thrombosis*  
12  
13 296 *research* 2013;132:180-4. doi: 10.1016/j.thromres.2013.06.026  
14  
15  
16  
17 297 16. Boone BA, Zenati MS, Rieser C, et al. Risk of Venous Thromboembolism for  
18  
19 298 Patients with Pancreatic Ductal Adenocarcinoma Undergoing Preoperative  
20  
21 299 Chemotherapy Followed by Surgical Resection. *Annals of surgical oncology*  
22  
23 300 2019;26:1503-11. doi: 10.1245/s10434-018-07148-z  
24  
25  
26  
27 301 17. Mier-Hicks A, Raj M, Do RK, et al. Incidence, Management, and Implications of  
28  
29 302 Visceral Thrombosis in Pancreatic Ductal Adenocarcinoma. *Clinical*  
30  
31 303 *colorectal cancer* 2018;17:121-28. doi: 10.1016/j.clcc.2018.01.008  
32  
33  
34  
35 304 18. Milsom CC, Yu JL, Mackman N, et al. Tissue factor regulation by epidermal  
36  
37 305 growth factor receptor and epithelial-to-mesenchymal transitions: effect on  
38  
39 306 tumor initiation and angiogenesis. *Cancer research* 2008;68:10068-76. doi:  
40  
41 307 10.1158/0008-5472.can-08-2067  
42  
43  
44  
45 308 19. Date K, Ettelaie C, Maraveyas A. Tissue factor-bearing microparticles and  
46  
47 309 inflammation: a potential mechanism for the development of venous  
48  
49 310 thromboembolism in cancer. *Journal of thrombosis and haemostasis : JTH*  
50  
51 311 2017;15:2289-99. doi: 10.1111/jth.13871  
52  
53  
54  
55  
56 312 20. Hu C, Huang L, Gest C, et al. Opposite regulation by PI3K/Akt and MAPK/ERK  
57  
58 313 pathways of tissue factor expression, cell-associated procoagulant activity and  
59  
60

- 
- 1  
2  
3  
4 314           invasiveness in MDA-MB-231 cells. *Journal of hematology & oncology*  
5  
6 315           2012;5:16. doi: 10.1186/1756-8722-5-16  
7  
8  
9 316 21. Chanakira A, Westmark PR, Ong IM, et al. Tissue factor-factor VIIa complex  
10  
11 317           triggers protease activated receptor 2-dependent growth factor release and  
12  
13 318           migration in ovarian cancer. *Gynecologic oncology* 2017;145:167-75. doi:  
14  
15 319           10.1016/j.ygyno.2017.01.022  
16  
17  
18 320 22. Chen K, Li Z, Jiang P, et al. Co-expression of CD133, CD44v6 and human tissue  
19  
20 321           factor is associated with metastasis and poor prognosis in pancreatic  
21  
22 322           carcinoma. *Oncology reports* 2014;32:755-63. doi: 10.3892/or.2014.3245  
23  
24  
25 323 23. Kakkar AK, Lemoine NR, Scully MF, et al. Tissue factor expression correlates  
26  
27 324           with histological grade in human pancreatic cancer. *British Journal of Surgery*  
28  
29 325           1995;82:1101-04.  
30  
31  
32 326 24. Nitori N, Ino Y, Nakanishi Y, et al. Prognostic significance of tissue factor in  
33  
34 327           pancreatic ductal adenocarcinoma. *Clinical cancer research : an official*  
35  
36 328           *journal of the American Association for Cancer Research* 2005;11:2531-9.  
37  
38 329           doi: 10.1158/1078-0432.ccr-04-0866  
39  
40  
41 330 25. Stang A. Critical evaluation of the Newcastle-Ottawa scale for the assessment of  
42  
43 331           the quality of nonrandomized studies in meta-analyses. *European journal of*  
44  
45 332           *epidemiology* 2010;25:603-05.  
46  
47  
48 333 26. Tierney JF, Stewart LA, Ghersi D, et al. Practical methods for incorporating  
49  
50 334           summary time-to-event data into meta-analysis. *Trials* 2007;8:16.  
51  
52  
53 335 27. Duval S, Tweedie R. Trim and fill: a simple funnel-plot-based method of testing  
54  
55  
56  
57  
58  
59  
60



336 and adjusting for publication bias in meta-analysis. *Biometrics*  
337 2000;56:455-63.

338 28. Iorio A, Spencer FA, Falavigna M, et al. Use of GRADE for assessment of  
339 evidence about prognosis: rating confidence in estimates of event rates in  
340 broad categories of patients. *bmj* 2015;350:h870.

341 29. Geddings JE, Mackman N. Tumor-derived tissue factor-positive microparticles  
342 and venous thrombosis in cancer patients. *Blood* 2013;122:1873-80. doi:  
343 10.1182/blood-2013-04-460139

#### 346 **Authors' contribution**

347 HYL and HC conceived the idea and planned the entire method of undertaking this  
348 study. HYL and YY wrote the protocol. YY, QLS, XPC and PZ designed the search  
349 strategy and planned the data extraction. DFW, PXT, BHG, XML, TZ, LX, DYX, LG  
350 and MEP made contributions in conceiving this research project. All authors revised  
351 and approved the final version of the manuscript.

#### 353 **Funding**

354 This work was supported by National Natural Science Foundation of China (No.  
355 81670594, 81470791, 81376597), Gansu Basic Research Innovation Group Project  
356 (No. 1606RJIA328), Gansu Scientific Research of Health Services Project (No.  
357 GSWSKY2017-09), Talents Innovation and Entrepreneurship Program of Lanzhou

---

1  
2  
3  
4 358 City (No. 2017-RC-62), Talent Staff Fund of the Second Hospital of Lanzhou  
5  
6 359 University (No. ynyjrckyzx2015-1-01), Cuiying Scientific and Technological  
7  
8  
9 360 Innovation Program of Lanzhou University Second Hospital (No. CY2017-ZD01,  
10  
11 361 CY2019-BJ09), Fundamental Research Funds for the Central Universities (No.  
12  
13 362 lzujbky-2016-k16, lzujbky-2017-79) and Cuiying Scientific Training Program for  
14  
15 363 Undergraduates of Lanzhou University Second Hospital (No. 2018-12).  
16  
17  
18  
19  
20  
21  
22  
23  
24  
25  
26  
27  
28  
29  
30  
31  
32  
33  
34  
35  
36  
37  
38  
39  
40  
41  
42  
43  
44  
45  
46  
47  
48  
49  
50  
51  
52  
53  
54  
55  
56  
57  
58  
59  
60

364

365 **Competing interest**

366 None declared

367

368 **Word count**

369 1782

### The search strategy in Medline

|     |                                            |
|-----|--------------------------------------------|
| #1  | pancreas [MeSh]                            |
| #2  | pancreas [Title/Abstract]                  |
| #3  | pancrea* [Title/Abstract]                  |
| #4  | #1-3 or                                    |
| #5  | carcinoma [MeSh]                           |
| #6  | adenocarcinoma [MeSh]                      |
| #7  | carcinoma, ductal [MeSh]                   |
| #8  | neoplasms [MeSh]                           |
| #9  | cancer* [Title/Abstract]                   |
| #10 | carcin* [Title/Abstract]                   |
| #11 | neoplas* [Title/Abstract]                  |
| #12 | tumo* [Title/Abstract]                     |
| #13 | cyst* [Title/Abstract]                     |
| #14 | growth* [Title/Abstract]                   |
| #15 | adenocarcin* [Title/Abstract]              |
| #16 | malig* [Title/Abstract]                    |
| #17 | #5-16 or                                   |
| #18 | thromboplastin [MeSh]                      |
| #19 | tissue factor [Title/Abstract]             |
| #20 | TF expression [Title/Abstract]             |
| #21 | TF-positive microparticle [Title/Abstract] |
| #22 | TF-positive MP [Title/Abstract]            |
| #23 | TF+MP [Title/Abstract]                     |
| #24 | TF-bearing microparticle [Title/Abstract]  |
| #25 | TF-bearing MP [Title/Abstract]             |
| #26 | microparticle-associated [Title/Abstract]  |
| #27 | MP-associated [Title/Abstract]             |
| #28 | MP TF [Title/Abstract]                     |
| #29 | TF-positive microvesicle [Title/Abstract]  |
| #30 | TF-positive MV [Title/Abstract]            |
| #31 | TF+MV [Title/Abstract]                     |
| #32 | TF-bearing microvesicle [Title/Abstract]   |
| #33 | TF-bearing MV [Title/Abstract]             |
| #34 | microvesicle-associated [Title/Abstract]   |
| #35 | MV-associated [Title/Abstract]             |
| #36 | MV TF [Title/Abstract]                     |
| #37 | CD142 antigens [Title/Abstract]            |
| #38 | coagulation factor III [Title/Abstract]    |
| #39 | #18-38                                     |
| #40 | #4 and #17 and #39                         |

## PRISMA-P 2015 Checklist

From: Shamseer L, Moher D, Clarke M, Ghersi D, Liberati A, Petticrew M, Shekelle P, Stewart L, PRISMA-P Group. Preferred reporting items for systematic review and meta-analysis protocols (PRISMA-P) 2015: elaboration and explanation. *BMJ*. 2015 Jan 2;349(jan02 1):g7647.

| Section/topic                     | #  | Checklist item                                                                                                                                                                                  | Information reported                |                                     | Line number(s)           |
|-----------------------------------|----|-------------------------------------------------------------------------------------------------------------------------------------------------------------------------------------------------|-------------------------------------|-------------------------------------|--------------------------|
|                                   |    |                                                                                                                                                                                                 | Yes                                 | No                                  |                          |
| <b>ADMINISTRATIVE INFORMATION</b> |    |                                                                                                                                                                                                 |                                     |                                     |                          |
| <b>Title</b>                      |    |                                                                                                                                                                                                 |                                     |                                     |                          |
| Identification                    | 1a | Identify the report as a protocol of a systematic review                                                                                                                                        | <input checked="" type="checkbox"/> | <input type="checkbox"/>            | Page 1, line 1-2         |
| Update                            | 1b | If the protocol is for an update of a previous systematic review, identify as such                                                                                                              | <input type="checkbox"/>            | <input checked="" type="checkbox"/> | Not Applicable           |
| <b>Registration</b>               | 2  | If registered, provide the name of the registry (e.g., PROSPERO) and registration number in the Abstract                                                                                        | <input checked="" type="checkbox"/> | <input type="checkbox"/>            | Page 3, line 53          |
| <b>Authors</b>                    |    |                                                                                                                                                                                                 |                                     |                                     |                          |
| Contact                           | 3a | Provide name, institutional affiliation, and e-mail address of all protocol authors; provide physical mailing address of corresponding author                                                   | <input checked="" type="checkbox"/> | <input type="checkbox"/>            | Page 1, line 3-16        |
| Contributions                     | 3b | Describe contributions of protocol authors and identify the guarantor of the review                                                                                                             | <input checked="" type="checkbox"/> | <input type="checkbox"/>            | Page 18, line 346-351    |
| <b>Amendments</b>                 | 4  | If the protocol represents an amendment of a previously completed or published protocol, identify as such and list changes; otherwise, state plan for documenting important protocol amendments | <input type="checkbox"/>            | <input checked="" type="checkbox"/> | Not Applicable           |
| <b>Support</b>                    |    |                                                                                                                                                                                                 |                                     |                                     |                          |
| Sources                           | 5a | Indicate sources of financial or other support for the review                                                                                                                                   | <input checked="" type="checkbox"/> | <input type="checkbox"/>            | Page 18-19, line 353-363 |
| Sponsor                           | 5b | Provide name for the review funder and/or sponsor                                                                                                                                               | <input checked="" type="checkbox"/> | <input type="checkbox"/>            | Page 18-19, line 353-363 |
| Role of sponsor/funder            | 5c | Describe roles of funder(s), sponsor(s), and/or institution(s), if any, in developing the protocol                                                                                              | <input checked="" type="checkbox"/> | <input type="checkbox"/>            | Page 18-19, line 353-363 |
| <b>INTRODUCTION</b>               |    |                                                                                                                                                                                                 |                                     |                                     |                          |
| <b>Rationale</b>                  | 6  | Describe the rationale for the review in the context of what is already known                                                                                                                   | <input checked="" type="checkbox"/> | <input type="checkbox"/>            | Page 5-6, line 72-105    |
| <b>Objectives</b>                 | 7  | Provide an explicit statement of the question(s) the review will address with reference to participants, interventions, comparators, and outcomes (PICO)                                        | <input checked="" type="checkbox"/> | <input type="checkbox"/>            | Page 6, line 109-113     |
| <b>METHODS</b>                    |    |                                                                                                                                                                                                 |                                     |                                     |                          |

| Section/topic                             | #   | Checklist item                                                                                                                                                                                                                              | Information reported                |                          | Line number(s)           |
|-------------------------------------------|-----|---------------------------------------------------------------------------------------------------------------------------------------------------------------------------------------------------------------------------------------------|-------------------------------------|--------------------------|--------------------------|
|                                           |     |                                                                                                                                                                                                                                             | Yes                                 | No                       |                          |
| <b>Eligibility criteria</b>               | 8   | Specify the study characteristics (e.g., PICO, study design, setting, time frame) and report characteristics (e.g., years considered, language, publication status) to be used as criteria for eligibility for the review                   | <input checked="" type="checkbox"/> | <input type="checkbox"/> | Page 7-8, line 117-145   |
| <b>Information sources</b>                | 9   | Describe all intended information sources (e.g., electronic databases, contact with study authors, trial registers, or other grey literature sources) with planned dates of coverage                                                        | <input checked="" type="checkbox"/> | <input type="checkbox"/> | Page 8, line 146-148     |
| <b>Search strategy</b>                    | 10  | Present draft of search strategy to be used for at least one electronic database, including planned limits, such that it could be repeated                                                                                                  | <input checked="" type="checkbox"/> | <input type="checkbox"/> | Page 8-9, line 149-162   |
| <b>STUDY RECORDS</b>                      |     |                                                                                                                                                                                                                                             |                                     |                          |                          |
| Data management                           | 11a | Describe the mechanism(s) that will be used to manage records and data throughout the review                                                                                                                                                | <input checked="" type="checkbox"/> | <input type="checkbox"/> | Page 9, line 164-166     |
| Selection process                         | 11b | State the process that will be used for selecting studies (e.g., two independent reviewers) through each phase of the review (i.e., screening, eligibility, and inclusion in meta-analysis)                                                 | <input checked="" type="checkbox"/> | <input type="checkbox"/> | Page 9, line 167-172     |
| Data collection process                   | 11c | Describe planned method of extracting data from reports (e.g., piloting forms, done independently, in duplicate), any processes for obtaining and confirming data from investigators                                                        | <input checked="" type="checkbox"/> | <input type="checkbox"/> | Page 9, line 167-172     |
| <b>Data items</b>                         | 12  | List and define all variables for which data will be sought (e.g., PICO items, funding sources), any pre-planned data assumptions and simplifications                                                                                       | <input checked="" type="checkbox"/> | <input type="checkbox"/> | Page 9-10, line 173-179  |
| <b>Outcomes and prioritization</b>        | 13  | List and define all outcomes for which data will be sought, including prioritization of main and additional outcomes, with rationale                                                                                                        | <input checked="" type="checkbox"/> | <input type="checkbox"/> | Page 7-8, line 134-141   |
| <b>Risk of bias in individual studies</b> | 14  | Describe anticipated methods for assessing risk of bias of individual studies, including whether this will be done at the outcome or study level, or both; state how this information will be used in data synthesis                        | <input checked="" type="checkbox"/> | <input type="checkbox"/> | Page 10, line 180-185    |
| <b>DATA</b>                               |     |                                                                                                                                                                                                                                             |                                     |                          |                          |
| <b>Synthesis</b>                          | 15a | Describe criteria under which study data will be quantitatively synthesized                                                                                                                                                                 | <input checked="" type="checkbox"/> | <input type="checkbox"/> | Page 10-11, line 186-208 |
|                                           | 15b | If data are appropriate for quantitative synthesis, describe planned summary measures, methods of handling data, and methods of combining data from studies, including any planned exploration of consistency (e.g., $I^2$ , Kendall's tau) | <input checked="" type="checkbox"/> | <input type="checkbox"/> | Page 10-11, line 186-208 |
|                                           | 15c | Describe any proposed additional analyses (e.g., sensitivity or subgroup analyses, meta-regression)                                                                                                                                         | <input checked="" type="checkbox"/> | <input type="checkbox"/> | Page 10-11, line 186-208 |
|                                           | 15d | If quantitative synthesis is not appropriate, describe the type of summary planned                                                                                                                                                          | <input checked="" type="checkbox"/> | <input type="checkbox"/> | Page 10-11, line 186-208 |
| <b>Meta-bias(es)</b>                      | 16  | Specify any planned assessment of meta-bias(es) (e.g., publication bias across studies, selective reporting within studies)                                                                                                                 | <input checked="" type="checkbox"/> | <input type="checkbox"/> | Page 11, line 209-212    |
| <b>Confidence in cumulative evidence</b>  | 17  | Describe how the strength of the body of evidence will be assessed (e.g., GRADE)                                                                                                                                                            | <input checked="" type="checkbox"/> | <input type="checkbox"/> | Page 11, line 213-215    |
