# Supplementary material for: Prognostic significance of tissue factor in patients with pancreatic cancer: a systematic review protocol
Source: PubMed Central journal article supplement — BMJ Open. 2020 Sep 14;10(9):e037431. doi: 10.1136/bmjopen-2020-037431 (PMC7490930; doi:10.1136/bmjopen-2020-037431), 2020-09-14
Supplement: bmjopen-2020-037431supp001.pdf [file bmjopen-2020-037431supp001.pdf]

### The search strategy in Medline

|     |                                            |
|-----|--------------------------------------------|
| #1  | pancreas [MeSh]                            |
| #2  | pancreas [Title/Abstract]                  |
| #3  | pancrea* [Title/Abstract]                  |
| #4  | #1-3 or                                    |
| #5  | carcinoma [MeSh]                           |
| #6  | adenocarcinoma [MeSh]                      |
| #7  | carcinoma, ductal [MeSh]                   |
| #8  | neoplasms [MeSh]                           |
| #9  | cancer* [Title/Abstract]                   |
| #10 | carcin* [Title/Abstract]                   |
| #11 | neoplas* [Title/Abstract]                  |
| #12 | tumo* [Title/Abstract]                     |
| #13 | cyst* [Title/Abstract]                     |
| #14 | growth* [Title/Abstract]                   |
| #15 | adenocarcin* [Title/Abstract]              |
| #16 | malig* [Title/Abstract]                    |
| #17 | #5-16 or                                   |
| #18 | thromboplastin [MeSh]                      |
| #19 | tissue factor [Title/Abstract]             |
| #20 | TF expression [Title/Abstract]             |
| #21 | TF-positive microparticle [Title/Abstract] |
| #22 | TF-positive MP [Title/Abstract]            |
| #23 | TF+MP [Title/Abstract]                     |
| #24 | TF-bearing microparticle [Title/Abstract]  |
| #25 | TF-bearing MP [Title/Abstract]             |
| #26 | microparticle-associated [Title/Abstract]  |
| #27 | MP-associated [Title/Abstract]             |
| #28 | MP TF [Title/Abstract]                     |
| #29 | TF-positive microvesicle [Title/Abstract]  |
| #30 | TF-positive MV [Title/Abstract]            |
| #31 | TF+MV [Title/Abstract]                     |
| #32 | TF-bearing microvesicle [Title/Abstract]   |
| #33 | TF-bearing MV [Title/Abstract]             |
| #34 | microvesicle-associated [Title/Abstract]   |
| #35 | MV-associated [Title/Abstract]             |
| #36 | MV TF [Title/Abstract]                     |
| #37 | CD142 antigens [Title/Abstract]            |
| #38 | coagulation factor III [Title/Abstract]    |
| #39 | #18-38                                     |
| #40 | #4 and #17 and #39                         |
